1 **Fluorescent Nanosensors Reveal Dynamic**  
2 **pH Gradients During Biofilm Formation**

3

4 Birte Blunk,<sup>a, b</sup> Mark Perkins,<sup>a, b</sup> Veeren M. Chauhan,<sup>b</sup>

5 Jonathan W. Aylott<sup>b</sup> & Kim R. Hardie<sup>a\*</sup>

6

7 <sup>a</sup> *Biodiscovery Institute, University Park, University of Nottingham, Nottingham,*

8 *NG7 2RD, UK*

9 <sup>b</sup> *Advanced Materials & Healthcare Technologies, School of Pharmacy,*

10 *Boots Science Building, Science Road, University of Nottingham,*

11 *Nottingham, NG7 2RD, UK*

12

13 **Abstract**

14 Understanding the dynamic environmental microniches of biofilms will permit us to detect, manage  
15 and exploit these communities. The components and architecture of biofilms have been interrogated  
16 in depth, however, little is known about the environmental microniches present. This is primarily  
17 because of the absence of tools with the required measurement sensitivity and resolution to detect  
18 these changes. We describe the application of ratiometric fluorescent pH-sensitive nanosensors, as a  
19 novel tool, to observe physiological pH changes in biofilms in real-time. Nanosensors comprised two  
20 pH-sensitive fluorophores covalently encapsulated with a reference pH-insensitive fluorophore in an  
21 inert polyacrylamide nanoparticle matrix. The nanosensors were used to analyse the real-time three-  
22 dimensional pH variation for two model biofilm formers: (i) opportunistic pathogen *Pseudomonas*  
23 *aeruginosa*, and (ii) oral pathogen *Streptococcus mutans*. The detection of sugar metabolism in real  
24 time by nanosensors provides a potential application to identify novel therapeutic solutions to  
25 improve oral health.

26

27 **Running title** pH nanosensors reveal dynamic gradients in biofilms

28

29 **Keywords** Fluorescent Nanosensors, pH, Biofilms, *Pseudomonas aeruginosa*, *Streptococcus mutans*

30

## 31 Introduction

32 The biofilm communities that bacteria form on surfaces are dynamic and complex. The architecture  
33 of biofilms and the identity of extracellular components have been characterised *in vitro* for a variety  
34 of biofilms, although there is discussion in the literature about how representative this is of *in vivo*  
35 bacterial communities <sup>1,2,3,4,5</sup>. Whilst there is evidence for fluid channels and microcolonies within *in*  
36 *vitro* biofilms, the characterization of the environmental microniches these create has been limited  
37 due to the absence of analytical tools that are suitably sensitive at the required resolution. In this  
38 article we demonstrate the application of fluorescent nanosensors capable of dynamic pH monitoring  
39 of the environmental microniches within biofilms using two important pathogens.

40 Firstly, we selected the Gram-negative bacterium *Pseudomonas aeruginosa*, an opportunistic  
41 pathogen, causing infections in immunocompromised patients including those suffering from burns,  
42 wounds and Cystic Fibrosis (CF) <sup>6,7,8,9</sup>. These infections are challenging to treat, due to the intrinsic  
43 antibiotic resistance of *P. aeruginosa*, which contributes to *P. aeruginosa* infections being the leading  
44 cause of morbidity for CF sufferers. *P. aeruginosa* is prevalent in the environment creating numerous  
45 potential reservoirs of infection. *P. aeruginosa* exerts its pathogenicity through the production of  
46 several factors including those shown to play a key role in biofilm attachment such as extracellular  
47 DNA <sup>10,11,12,13</sup>. Biofilm formation by *P. aeruginosa* is particularly important for it to establish chronic  
48 infections and has therefore been studied intensively.

49 Secondly, we chose the Gram-positive oral pathogen *Streptococcus mutans*. Oral biofilms play a crucial  
50 role in the aetiology of oral diseases, such as dental caries and periodontitis, which can lead to  
51 increased economic burden and reduced quality of life <sup>14</sup>. Oral biofilms are characterised by a bacterial  
52 shift from early colonisers of the tooth towards increasingly acid-producing (acidogenic) and acid  
53 tolerant (aciduric) species <sup>15</sup>. *S. mutans* is both an aciduric and acidogenic bacterium and a  
54 pre-dominant species in late stage oral biofilms <sup>16,17</sup>. The interest in oral bacteria such as *S. mutans*  
55 lies in their participation in dental caries, the most common infection affecting humans, through the

56 production of organic acids<sup>18</sup>. Initially, *S. mutans* uses sucrose as a substrate to synthesise glucan *via*  
57 glucosyltransferases, in order to provide anchoring sites on the tooth's enamel. This enables bacteria  
58 to continue to colonise and establish more biofilm<sup>19,20,21</sup>. Once established, *S. mutans* ferments  
59 available carbohydrates, readily found in a sugar-laden diet, which results in the production of organic  
60 acids<sup>16</sup>. This acidification leads to the formation of dental caries<sup>22,23,24</sup>. Robust, well characterised  
61 biofilm models exist for both *P. aeruginosa* and *S. mutans*, making them an ideal choice for this study.

62 An environmental characteristic unlikely to be static and homogeneous in biofilms is pH, making it an  
63 attractive option to quantify spatially in real-time. It is also important to characterize the  
64 environmental pH of microorganisms because it can influence many different physiochemical  
65 properties such as polymer-polymer, ion-polymer and macromolecule-polymer interactions<sup>25</sup>.  
66 Furthermore, the formation of chemical gradients (such as in pH, redox potential and ions) within the  
67 biofilm community can provide indications about microbial metabolism<sup>26,27,28,29,30</sup>.

68 In the literature, the observations of the relationship between pH and biofilm formation differ. For  
69 example, Ahmed *et al.* demonstrated that a trigger of biofilm formation in some bacteria, autoinducer-  
70 2-signalling (AI-2), is temperature dependent in *Streptococcus intermedius* but not pH dependent  
71<sup>31,32,33</sup>. In contrast, Sun *et al.* showed that a low pH together with glucose could improve AI-2 activity  
72 and that the addition of a low concentration of boracic acid induces the synthesis of AI-2<sup>34</sup>. Although  
73 this could be relevant for *S. mutans*, *P. aeruginosa* does not synthesise AI-2. However, like many other  
74 bacteria, some of the molecules which *P. aeruginosa* produces, such as signal molecules for quorum  
75 sensing (QS) to mediate population density dependent cell-cell communication, are *N*-acylhomoserine  
76 lactones (AHLs). AHLs have been implicated in biofilm formation for many bacterial species. For  
77 instance, Yates *et al.* showed that the lactonolysis of AHLs is pH dependent, with ring closure only  
78 taking place at reduced pH levels<sup>35</sup>, whereas Hostacka *et al.* demonstrated an accelerated biofilm  
79 production for *P. aeruginosa* at pH 7.5 and pH 8.5 in comparison to pH 5.5 using crystal violet



80 quantification<sup>36</sup>. A similar behaviour was described by Stoodley *et al.* who observed that *P. aeruginosa*  
81 biofilm thickness fell to 68% at a low pH of 3<sup>37</sup>.

82 In contrast, studying the Gram-positive bacteria *Staphylococcus aureus* and *Staphylococcus epidermidis*,  
83 Nostro *et al.* found biofilms were 2.5 to 3 times thinner at high pH levels suggesting this to be a  
84 possible way to control biofilm formation in this species<sup>38</sup>. Studies of *Streptococcus agalactiae*, whose  
85 infection can result in meningitis, have shown an accelerated biofilm formation in highly acidic  
86 conditions<sup>39</sup>. For other group B streptococcal isolates, the same behaviour was found in vaginal  
87 infections of pregnant women where clinical isolates showed a higher biofilm formation rate at a  
88 vaginal pH of 4.5 in comparison to pH 7<sup>40</sup>.

89 There are a variety of methods to measure intracellular pH, including nuclear magnetic resonance  
90 spectroscopy (NMR), microelectrodes, surface-enhanced Raman scattering (SERS) and two-photon  
91 excitation microscopy (TPE)<sup>28,41,42,43</sup>. However, those technologies are not accessible to all laboratories  
92 and the resolution of some of the methods is not yet comparable to fluorescent-based measurements  
93<sup>25,43,44</sup>. Therefore, nanosensors containing commercially available fluorophores have aroused  
94 increasing interest and are most widely implemented in approaches to pH measurement.

95 Nanosensors are nanoparticles that can be used for the detection and measurement of small  
96 environmental changes. Fluorescent nanosensors consist of spherical polymer particles carrying  
97 fluorophores (signal transducer) generating fast, bright responses that can be measured using real  
98 time fluorescent microscopy<sup>25,45</sup>. Incorporation of different pH-sensitive fluorophores in the correct  
99 ratio in a single nanosensor can enable the detection of the full physiological pH spectrum from pH  
100 3.5 to pH 7.5<sup>46,47,48</sup>.

101 A range of different pH nanosensors has already been applied in biological research, for example in  
102 cancer research where it has been suggested that low oxygen concentration and low pH increase the  
103 potential of cancer metastasis and reduce the treatment prognosis for patients with advanced stage  
104 cancers<sup>49</sup>. Within microbiology, silica based nanosensors were used to analyse pH microenvironments

105 in microbial biofilms of *Escherichia coli*<sup>44</sup>. Hidalgo *et al.* could show local variation in pH from the  
106 neutral outside surface of the film to the acidic core. Nanosensors with a single fluorescent ratiometric  
107 pH-sensitive probe were used to reveal pH heterogeneity throughout a *P. aeruginosa* biofilm<sup>25</sup>. A  
108 slightly acidic biofilm environment was reported with a pH range between 5.6 within the biofilm and  
109 7.0 in the bulk fluid<sup>25</sup>. More recently, Fulaz *et al.* reported the use of pH-sensitive nanosensors to  
110 detect pH gradients in biofilms, but did not extend their study to real time analysis of the  
111 environmental microniches under flow conditions<sup>50</sup>.

112 As different laboratories use a variety of nanoparticles, characterisation of the interaction of  
113 nanoparticles with bacteria and biofilm components is required. For their use in biological systems, it  
114 is important that the nanoparticles do not alter the metabolism and behaviour of the cells.

115 The development of nanoparticles has also been mentioned as a prevention method for application  
116 in early stages of diseases<sup>51</sup>. Biodegradable polymer based nano- and microparticles can, for example,  
117 be used to encapsulate antibiotics to ensure a targeted release of the antimicrobial substance<sup>52,53,54</sup>.  
118 Therefore, it is important to understand the interaction between the nanoparticles and the biofilm  
119 and to establish the penetration of nanoparticles into the biofilm. Penetration usually occurs by  
120 diffusion where the nanoparticles are interacting with either the bacteria or the biofilm matrix  
121 components<sup>52,55,56</sup>. The diffusion characteristics of the nanoparticles mostly depend on their size and  
122 charge but are also influenced by pore size of the biofilm, the charge and chemical gradient of the  
123 biofilm matrix, and the hydrophobicity of the environment<sup>52,56,57,58</sup>. An increasing size and negative  
124 charge of carboxylated silver nanoparticles has been reported to reduce their diffusion into  
125 *Pseudomonas fluorescens* biofilms<sup>56</sup>. A similar behaviour was seen for anionic liposomes added to a  
126 *Staphylococcus aureus* biofilm, where the liposomes could not penetrate the biofilm, possibly due to  
127 the negative surface charge of the bacteria<sup>59</sup>.

128 From the repertoire of nanosensors available to us, we selected polyacrylamide-based nanoparticles  
129 due to their small size. This differed from the nanosensors used by Fulaz *et al.*, which were silica based

130 <sup>50</sup>. To enable a physiological range between pH 3 and pH 8 to be measured and visualised, two pH-  
131 sensitive fluorophores, Oregon green (OG) and 5(6)-carboxyfluorescein (FAM), were used. These  
132 fluorophores together with a reference pH-insensitive fluorophore,  
133 5(6)-carboxytetramethylrhodamine (TAMRA), were covalently linked to a polyacrylamide nanoparticle  
134 matrix to synthesise ratiometric pH-sensitive nanosensors. To evaluate the influence of charge, both  
135 neutral and positively charged versions of the nanosensors were produced.

136 The fluorescent pH-sensitive polyacrylamide-based nanoparticles were used to investigate the pH  
137 microenvironments of *P. aeruginosa* biofilms. The penetration and interactions of the nanosensors  
138 within the biofilm were characterized, and the use of nutrient flow and time-lapse imaging enabled  
139 real-time reporting of pH modulation within a biofilm to be monitored. We reveal an acidic core within  
140 microcolonies and acidification in the downstream flow. In addition, this study highlighted the  
141 advantages of nanosensors by using a biologically relevant model for oral health; detecting the effects  
142 of various carbohydrates on the external pH of a culture and providing the potential application of this  
143 methodology in the development of novel treatments for dental caries.

## 144 **Results**

145 From the broad selection of nanoparticles available to us <sup>60,61</sup>, polyacrylamide nanoparticles were  
146 selected. The basis for this choice was to have nanosensors available that were small enough to  
147 penetrate deep into biofilms and report with the sensitivity required for high resolution imaging as  
148 well as the option to alter surface characteristics and thereby manipulate interactions with the  
149 extracellular matrix. Polyacrylamide nanoparticles can be prepared at a smaller size  
150 (34.77 +/- 4.63 nm, see Table 1) to those based on silica that were used previously (47 +/- 5 nm) <sup>50</sup>,  
151 and with different surface charges. From our two model bacteria, *P. aeruginosa* was chosen for our  
152 initial optimization experiments due to the availability of both static and flow biofilm models.

153 **The addition of positively charged pH-sensitive polyacrylamide nanosensors to PAO1-N WT results**  
154 **in a thicker and more robust biofilm.**

155 Having settled on *P. aeruginosa* as our model system for initial optimisation experiments, strain PAO1-  
156 Nottingham (PAO1-N) was initially chosen to analyse the influence of nanosensors on biofilm growth.  
157 The nanosensors were suspended in the cell culture prior to the incubation with bacteria. The  
158 resultant biofilms, grown with and without nanosensors under static conditions, were analysed after  
159 48 h using fluorescence Confocal Laser Scanning Microscopy (CLSM, Fig. 1a). The neutral pH-sensitive  
160 nanosensors dispersed throughout the *P. aeruginosa* biofilm without altering their architecture or  
161 thickness (Fig. 1a). Positively charged pH-sensitive nanosensors containing  
162 acrylamidopropyltrimethylammonium chloride (ACTA) were exchanged with the neutral pH-sensitive  
163 polyacrylamide nanosensors. Interestingly, biofilms grown together with the positively charged pH-  
164 sensitive polyacrylamide nanosensors were approximately four times thicker (40  $\mu\text{m}$ ) compared to  
165 biofilms grown in the absence of nanosensors or with neutral pH-sensitive nanosensors ( $\sim 10 \mu\text{m}$ )  
166 (Fig. 1a). The general structure of the biofilms grown with positively charged pH-sensitive nanosensors  
167 was also notably different, showing a very dense structure. To exclude the possibility that the dyes  
168 incorporated within the polymer matrix of the positively charged pH-sensitive nanosensors were  
169 responsible for the enhanced biofilm formation, positively charged polyacrylamide nanoparticles  
170 featuring the same characteristics in size and charge were produced without inclusion of the  
171 fluorophores (Table 1). The addition of these nanoparticles led to the similar increases in biofilm  
172 thickness and robustness as the positively charged nanosensors, suggesting that the charge of the  
173 particles was responsible for the change in the biofilm formation.

174 Quantitative analysis of the images using Comstat, an open source programme used to analyse image  
175 stacks of biofilms<sup>62,63,64</sup>, revealed that there is no significant difference between the biofilms produced  
176 in the absence of nanoparticles or with neutral nanosensors (Fig. 1b and c). Furthermore, a  
177 significantly lower biomass for biofilms grown without nanosensors or with neutral nanosensors was  
178 confirmed ( $p < 0.0001$ , Fig. 1b). In contrast, no significant difference in biofilm biomass was detected

179 between formation in the presence of positively charged pH nanosensors and the positively charged  
180 nanoparticles without dyes. In addition, a significantly higher surface area to biovolume ratio for  
181 biofilms grown without nanosensors or with neutral nanosensors than those grown with positively  
182 charged nanosensors was observed ( $p < 0.0001$ , Fig. 1c).

183 **The concentration of the nanosensors is critical to achieve thicker, more robust biofilms.**

184 The effects of nanosensors upon *P. aeruginosa* were assessed by introducing different concentrations  
185 of nanosensors to planktonic cell cultures. To detect the effects, the growth of the bacteria was  
186 monitored via the  $OD_{600}$  every 15 min for 24 h in 96 well TECAN plates. No growth inhibition was  
187 observed for nanosensor concentrations below  $25 \text{ mg mL}^{-1}$  (Supplementary Fig. 1). To investigate  
188 whether higher concentrations of nanosensors would lead to an even thicker biofilm than using the  
189 normal previously selected concentration of  $1 \text{ mg mL}^{-1}$ , biofilms were grown under the same  
190 conditions using  $10 \text{ mg mL}^{-1}$  or  $20 \text{ mg mL}^{-1}$  positively charged nanosensors. CLSM revealed that a  
191 higher concentration of positively charged nanosensors does not seem to further enhance the biofilm  
192 formation, instead the thickness is reduced compared to when  $1 \text{ mg mL}^{-1}$  nanosensors were  
193 introduced (Fig. 2). This was again underlined using Comstat for quantitative analysis of the different  
194 conditions, where a significant reduction in biomass was observed for biofilms grown with 10 or  
195  $20 \text{ mg mL}^{-1}$  compared to  $1 \text{ mg mL}^{-1}$  nanosensors ( $p < 0.0001$ ).

196 **Polyacrylamide nanosensors rapidly penetrate an established biofilm.**

197 To investigate if nanosensors can penetrate an already established *P. aeruginosa* biofilm, nanosensors  
198 were added to a 48-h matured biofilm. Penetration of the sensors was assessed using fluorescence  
199 CLSM. To ensure that a thick biofilm could be used for the analysis, the bacteria were pre-grown with  
200 positively charged nanoparticles without fluorophores. After imaging the biofilm, positively charged  
201 or neutral nanosensors were added to the cultures and the biofilms were immediately imaged again  
202 without washing. Penetration of the biofilm by the nanosensors was assessed by tracking the  
203 fluorescence of the nanosensors throughout the thickness of the biofilm. Fluorescence within the

204 whole biofilm was observed after 3 min following the addition of the nanosensors suggesting that the  
205 nanosensors enter the biofilm very quickly and without obvious resistance. This behaviour was  
206 observed for both the neutral and the positively charged nanosensors.

207 Interestingly, when the biofilms were grown initially without the positive nanoparticles, the structure  
208 of the biofilm was disrupted when positively charged nanosensors were added but not when neutral  
209 nanosensors were added, supporting the observation that growing PAO1-N together with the positive  
210 nanoparticles results in a denser biofilm (Fig. 3).

211 In addition to a static biofilm, the flow cell BioFlux system was used to investigate penetration of  
212 biofilms by both neutral and positive nanosensors (Fig. 4). After initially growing the biofilm for 12 h  
213 in the absence of nanosensors, the inlet of the flow medium was switched to a medium containing  
214 nanosensors for 5 h followed by a switch back to medium without nanosensors for another 5 h. CLSM  
215 at the end point showed that there were nanosensors incorporated within the biofilm indicating  
216 penetration of the biofilm by the nanosensors. Neither neutral nor positive nanosensors changed the  
217 biofilm structure or thickness when grown within the BioFlux system.

218 **pH changes can be observed during biofilm formation in a flow cell system at a microcolony level**  
219 **using polyacrylamide nanosensors and time-lapse imaging.**

220 Time-lapse imaging together with the nanosensor technology was used to investigate pH changes  
221 during biofilm formation of *P. aeruginosa* PAO1-N over time in a BioFlux flow cell system. Images were  
222 taken every 15 min for 16 h using a Nikon widefield microscope. A red region of interest indicates a  
223 low pH, due to diminishing signal from OG & FAM under acidic conditions, whereas green to orange  
224 indicate relatively higher pH values, due to an increase in fluorescence from OG and FAM. During the  
225 first couple of hours after microcolony formation starts, the pH increases slightly as observed by a  
226 colour shift from a more orange colour (lower pH) towards a more greenish colour (higher pH).

227 Once the microcolonies started to form after 10 h, the colour around the microcolonies changed to  
228 red indicating an acidification during the microcolony formation. Red streaks could be observed after

229 13 h coming from the microcolonies and being taken away by the flow (Fig. 5 a). Subsequently, the  
230 colour continued changing towards red until the whole biofilm was acidified. This observation was  
231 confirmed by analysing the fluorescence intensity of the green channel (pH sensitive dyes) and red  
232 channel (reference dye) using ImageJ (Fig. 5 b). Over the first hours when microcolonies started to  
233 form, the fluorescence intensity ratio of OG/FAM and TAMRA increased slightly from 1.5 to 1.6,  
234 indicating a pH increase. The fluorescence intensity around the microcolonies starts to decrease after  
235 10 h before the intensity of the medium declines. After 16 h of biofilm growth, the fluorescence  
236 intensity ratio around the microcolonies as well as within the medium reaches 1.25, indicating an  
237 acidification of the whole biofilm. A video of the time-lapse imaging can be found in supplementary  
238 (Supplementary Movie 1).

239 **Single microcolonies of a PAO1-N biofilm show pH variation from a more acidic environment within**  
240 **the core to a more neutral pH on the outside surface.**

241 CLSM was used to look at the pH variation of single microcolonies of a *P. aeruginosa* PAO1-N biofilm  
242 grown within a BioFlux flow cell. The biofilm was imaged in 1  $\mu\text{m}$  steps up to 25  $\mu\text{m}$ . The 3D Z-stack  
243 shows a colour change from red within the core of the microcolonies towards yellow at the outer parts  
244 (Fig. 6 a). After calibration of the nanosensors using pH buffers ranging from pH 3 to 8, pH maps and  
245 a 3D rendering of the Z-stack of the biofilm were generated using the software MatLab<sup>65</sup>. The values  
246 of the pH maps correlate with the observations from the 3D Z-stack showing a low pH within the  
247 microcolonies ( $\sim\text{pH } 3.5 - 4.5$ ) and a more neutral pH towards the outside (pH 6.0 – 7.0) (Fig. 6 b and c).  
248 A video of the 3D rendering can be found in supplementary (Supplementary Movie 2).

249 **The addition of glucose drastically reduces the pH of the medium when added to starved planktonic**  
250 ***S. mutans***

251 Having optimised the inclusion of positive pH-sensitive polyacrylamide nanosensors in *P. aeruginosa*  
252 biofilms under both static and flow conditions, we applied our novel tool to the analysis of our second  
253 bacterial model with the aim to translate our fundamental observations to an applied scenario. If we

254 could demonstrate acidification of the environment by the oral pathogen *S. mutans* linked to the  
255 presence of its preferred sugars, our findings would provide a valuable method to assess potential  
256 treatments for dental caries. Bearing this in mind, the response of starved planktonic *S. mutans* to  
257 the introduction of fermentable carbon sources (glucose and sucrose) versus a non-fermentable  
258 carbon source (xylose and xylitol) was analysed, with the aim of detecting any pH changes in the  
259 medium as an indirect measurement of the fermentation of a carbon source.

260 Fluorescence microscopy revealed that the control with saline remained unchanged throughout the  
261 experiment. This was also the case following the introduction of the non-fermentable xylose and  
262 xylitol, which resulted in no significant change in the pH during the 30 min period. In contrast, during  
263 the same time period, the addition of both glucose and sucrose to the starved cells led to a drastic  
264 reduction in pH from ~pH 5.3 to ~pH 3.8 and ~pH 5.2 to ~pH 3.9, respectively (Fig. 7).

## 265 **Discussion**

266 This study has shown that pH-sensitive polyacrylamide nanosensors penetrate biofilms of  
267 *P. aeruginosa*, and report on pH modulation for both our chosen model bacteria, *P. aeruginosa* and *S.*  
268 *mutans*. Once nanosensors have been integrated into biofilms, they are capable of real-time pH  
269 quantification in static model systems at high temporal, spatial and measurement resolution that  
270 permits determination of (i) a pH gradient across the biofilm thickness, and also (ii) an acidic core to  
271 microcolonies. For the first time, these studies also include time-lapse imaging that reveals  
272 acidification downstream of microcolonies in a flow biofilm model of *P. aeruginosa*. Moreover, in  
273 static models, nanosensors with a positive charge supported the formation of thicker *P. aeruginosa*  
274 biofilms. Finally, detection of fermentation of preferred sugars by *S. mutans* has the potential to  
275 provide the opportunity to test treatments intended to reduce the progression of dental caries. These  
276 studies provide a rationale for, and contribute to the understanding of, the substitution to alternate  
277 sugars (xylose and xylitol) for patients at high risk of oral health complications, that could lead to  
278 dental caries formation.



279 The selection of appropriate nanosensors, especially with regards to their charge, is crucial for the  
280 analysis of microbial biofilms. The nanosensors chosen for this work are well suited to analyse pH  
281 changes over time using time-lapse imaging as well as to look at pH variation within single  
282 microcolonies using CLSM. The biofilm thickness promoting effect of positively charged  
283 polyacrylamide nanosensors upon static PAO1-N biofilms was independent of the incorporation of  
284 fluorophores and conferred an enhanced robustness to the biofilms. Penetration of biofilms by  
285 nanoparticles usually occurs by diffusion, with particles interacting with the bacteria and the biofilm  
286 matrix components<sup>66,67,68,69</sup>. Due to the negative surface charge of PAO1-N, it is likely that the  
287 positively charged nanosensors are interacting directly with the bacteria. This interaction could  
288 facilitate the bacteria to attach to each other and form a denser biofilm as seen here. The nanosensors  
289 would in this case function as 'glue', sticking the cells together and enable biofilm development. When  
290 neutral nanosensors or negatively charged particles are used, this interaction is reduced or even  
291 reversed most likely due to the same charge of the bacteria and nanoparticles leading to repulsion  
292 instead<sup>44,59</sup>. The enhanced biofilm formation was not observed when biofilms were grown in the  
293 BioFlux flow cell system. Due to the constant flow of medium, it could be postulated that the bacteria  
294 are less influenced by the nanosensors and therefore their adherence to each other is not modulated.  
295 The increased thickness of static biofilms was dependent on the concentration of the nanosensors,  
296 where higher concentrations of up to 20 mg mL<sup>-1</sup> did not intensify the effect, but instead led to a  
297 biofilm which was less uniform and robust compared to the biofilms incubated with the working  
298 concentration of nanosensors (1 mg mL<sup>-1</sup>). Nanosensor concentrations below 20 mg mL<sup>-1</sup> did not affect  
299 the growth of planktonic PAO1-N. It follows that a higher concentration could simply result in flooding  
300 of the biofilm with positively charged particles. Too many positively charged nanosensors would be  
301 predicted to lead to a repulsion between the nanosensors and possibly other positively charged  
302 biofilm components, and consequently less adherence between bacteria, which would in turn reduce  
303 the robustness of the biofilm and potentially adversely affect its uniformity.

304 One negatively charged component of a biofilm that plays an important role for the formation of  
305 biofilms is extracellular DNA (eDNA). In a study using 0.2  $\mu\text{m}$  positively and negatively charged  
306 fluorescent polystyrene nanoparticles with *Burkholderia cepacia* it was shown that the addition of  
307 DNase to the biofilm enhanced the diffusion coefficient of the positively charged nanoparticles,  
308 suggesting that there is an interaction between positively charged nanoparticles and the eDNA. This  
309 could further increase the 'glue' effect and enhance biofilm formation <sup>70</sup>. Since the polyacrylamide  
310 nanosensors used in our study penetrated biofilms so rapidly (within minutes), diffusion gradients  
311 would be challenging to measure, and because eDNA deficient mutants of *P. aeruginosa* fail to form  
312 biofilms, further investigation of matrix-nanosensor interactions were beyond this study, and will form  
313 part of future investigations.

314 When positively charged nanosensors were added to biofilms that were initially grown without  
315 nanosensors, the biofilm growth structure was disrupted. This behaviour was not seen when biofilms  
316 were grown with positively charged nanoparticles from the beginning. One hypothesis that could be  
317 drawn from this, is that biofilms initially grown with positive nanoparticles were more robust. The less  
318 robust biofilms formed in the absence of positively charged nanoparticles might be susceptible to  
319 disruption upon introduction of positively charged nanoparticles capable of interacting with the  
320 bacterial cell surface or matrix components. This has also been observed by Li *et al.* who used  
321 positively charged block copolymer nanoparticles to disperse established biofilms of multidrug-  
322 resistant Gram-positive bacteria <sup>71</sup>. The situation appears to differ in flow cell biofilms since both  
323 neutral and positively charged nanosensors were able to penetrate an already established biofilm that  
324 had been grown for 12 h. Even after changing the flow cell back to a medium without nanosensors,  
325 the nanosensors were still detectable and incorporated within the biofilm. This has the practical  
326 application for future investigation as it indicates that the nanosensors can be added at later  
327 timepoints for pH analysis if needed.

328 Being able to increase the thickness of biofilms has beneficial implications. For example, the positively  
329 charged nanosensors could be employed in future studies to elucidate the mechanistic steps of biofilm  
330 formation by combining them with mutants defective in defined aspects of biofilm formation. On the  
331 other hand, neutral nanosensors could be the better choice to study biofilms that closely mimic the  
332 natural physiological or environmental conditions, as no structural change in biofilm formation  
333 behaviour was observed when they were applied to our models.

334 Extrapolating from the influence of nanoparticle charge on biofilm formation, it is interesting to  
335 speculate that the charge of antimicrobials could influence the structure of biofilms. For example,  
336 antimicrobials with a positive charge could not only have biocidal effects such as benzalkonium  
337 chloride<sup>72</sup>, but also interact with cells in a way that could enhance biofilm formation or dispersal. It  
338 would follow that this might affect medical treatment or anti-biofouling regimens. It will therefore be  
339 interesting to monitor local pH modulation during antimicrobial application to developing or  
340 established biofilms and correlate this with biofilm architectural changes.

341 This study has shown for the first time, that pH-sensitive polyacrylamide nanosensors can be used to  
342 visualise pH changes over time during biofilm formation of PAO1-N within a BioFlux flow cell system  
343 at a microcolony level. At the beginning of the biofilm formation, the pH increases very slightly as the  
344 bacteria start to adapt to the environment. After 10 h, acidification of the biofilm was observed during  
345 microcolony formation and subsequently while the biofilm continued to form. The acidic streaks that  
346 were released by the microcolonies could be exoproducts from the bacteria, produced during  
347 metabolism<sup>44</sup>. Another possibility is that acidic molecules are released by the cells to help form the  
348 biofilms. These molecules could for example be eDNA or exopolysaccharides (EPS). It could also be  
349 that the cells are actively lowering the pH when biofilm formation is initiated, to facilitate the process,  
350 for example to enable better attachment or to increase the turn-over and release of quorum sensing  
351 molecules like AHLs<sup>35,73</sup>.

352 In addition to the pH changes observed over time within the whole biofilm, pH variation was also  
353 detected within single microcolonies, showing a more acidic environment within the core of the  
354 microcolonies and a more neutral pH at the outside edge of the colonies. The acidic cores could result  
355 from the production and release of acidic metabolites during growth and biofilm formation.  
356 Furthermore, oxygen will likely be depleted within the core and no fresh oxygen would reach the inner  
357 part of the microcolonies resulting in fermentation processes of the cells, which would then lead to  
358 the production of acidic products, reducing the pH <sup>26</sup>.

359 To provide a translational benefit of the pH-sensitive nanosensors, they were dispersed within the  
360 medium of starved planktonic *S. mutans*, to measure changes in fluorescence intensity and calculate  
361 the resultant external pH changes. By utilising the well-studied biological system of *S. mutans*, where  
362 carbohydrate supplementation can induce a pH response, the effectiveness of the pH sensitive  
363 polyacrylamide nanosensors as a real-time tool to accurately determine pH changes in extracellular  
364 media was illustrated. Oral bacteria including *S. mutans*, must adapt to the shifting availability of  
365 carbohydrates caused by changes in host behaviours. These can be brought on through the fluctuation  
366 of diets, as well as through host secretions of glycoproteins and those carbohydrates produced by the  
367 oral microbiome itself <sup>74</sup>. *S. mutans* is therefore versatile in the carbohydrates it can utilise <sup>75</sup>. With  
368 the addition of simple mono- and disaccharides such as glucose or sucrose, a reduction in the pH was  
369 observed, as *S. mutans* is capable of metabolising both glucose and sucrose via glycolysis to produce  
370 pyruvate <sup>16</sup>. The resultant pyruvate is metabolised to form L-lactate which would be secreted in the  
371 form of lactic acid, leading to the reduction of the pH of the medium <sup>76</sup>. However, with the addition of  
372 xylose or its derivative, xylitol, the external pH was unchanged throughout the experiment. This was  
373 a result of both xylose and xylitol being non-fermentative by *S. mutans* <sup>77</sup>. Xylose is initially taken up  
374 and reduced to xylitol, which is then phosphorylated to xylitol-5-phosphate (X5P). *S. mutans* is unable  
375 to metabolise X5P further, and as a result X5P is accumulated intracellularly <sup>78</sup>. This accumulation of  
376 X5P has been attributed to the inhibition of glycolytic enzymes; leading to the repression of acid  
377 production <sup>78,79</sup>. However, Takahashi and Washio <sup>80</sup> were able to show that the presence of X5P had

378 no effect on acid production when supragingival plaques were rinsed with glucose after an initial  
379 application of xylitol. This would imply that xylitol is simply a non-fermentative sugar alcohol rather  
380 than an inhibitor.

381 A practical application of our nanosensor system could be envisioned for testing oral hygiene products  
382 or sweetener alternatives in soft drink production, in order to determine the impact on pH production.  
383 The nanosensors would provide flexibility, as a screening tool to measure pH changes in high  
384 throughput fluorescence assays. Alternatively, the nanosensors could be used as a more focused tool,  
385 to track changes in the pH microenvironment of established oral biofilms over time, to map 3D pH  
386 microenvironments as highlighted by our analysis in the flow cell.

387 Future work will also explore the molecular mechanisms underpinning the detected acidification of  
388 the biofilms and microcolony centres. For example, different fluorophores could be used to stain eDNA  
389 or EPS components to investigate whether either correlates with the acidic streaks observed.  
390 Furthermore, adding or changing dyes in the nanosensors could enable more powerful tools to be  
391 developed for monitoring broader environmental microniche changes within biofilms in real-time and  
392 at high resolution.

393

## 394 **Materials and Methods**

### 395 **Materials**

396 Oregon Green<sup>®</sup> 488 carboxylic acid (OG), 5-(and-6)-carboxyfluorescein (FAM) and 5-(and-6)-  
397 carboxytetramethylrhodamine (TAMRA) were obtained from Invitrogen<sup>™</sup>, USA. Acrylamide (≥99%),  
398 N,N'-methylenebis(acrylamide) (bisacrylamide, 99%), dioctylsulfosuccinate sodium (AOT), ammonium  
399 persulphate (APS, ≥98%), 3-acrylamidopropyltrimethyl ammonium hydrochloride (ACTA, 75 wt. % in  
400 H<sub>2</sub>O), polyoxyethylene(4)lauryl ether (Brij L4<sup>®</sup>), sodium tetraborate decahydrate (≥99.5%) and  
401 N,N,N,N-tetramethyl- ethylenediamine (TEMED, 99%) were purchased from Sigma Aldrich, US. N-(3-

402 Aminopropyl) methacrylamide hydrochloride (APMA, >98%) was obtained from Polysciences Inc,  
403 Germany. Hexane, ethanol absolute (99.5%) and phosphate buffer saline (PBS) were obtained from  
404 Fisher Scientific, UK. Unless otherwise mentioned, all the chemicals that used throughout this study  
405 were of analytical grade.

#### 406 **Minimal medium (M9)**

407 Minimal medium (M9) was prepared by using 200 mL of 5x M9 salts (Sigma Aldrich), 2 mL MgSO<sub>4</sub> (1M),  
408 100 µL CaCl<sub>2</sub> (1M) and 40 mL Succinate (0.5 M) in a total of 1 L.

#### 409 **Bacterial strains and growth culture**

410 The bacterial strains used in this study were PAO1-N wildtype<sup>81</sup> and *Streptococcus mutans* NCTC  
411 10449<sup>82</sup>. Lysogeny Broth (LB)<sup>83</sup> was used as standard growth medium (liquid or solid as agar plate)  
412 for PAO1 and Brain Heart Infusion (BHI) for NCTC 10449. *P. aeruginosa* strains were grown at 37°C for  
413 16-20 h, *S. mutans* strains were grown at 37°C for 48 h. Liquid cultures were prepared in 5 mL liquid  
414 media, inoculated with a single bacterial colony and shaken at 200 rpm (PAO1) or incubated in a static  
415 incubator (NCTC 10449) overnight. Strains were stored for the longer term as glycerol cultures which  
416 were made by using 500 µL overnight culture with 500 µL sterile 50% glycerol and stored at 80°C.

#### 417 **Static biofilm growth of PAO1**

418 Overnight cultures of *P. aeruginosa* grown in LB were used to spin down 1 mL of cells in a fresh  
419 Eppendorf tube at 1000 x *g* for 1 min. The pellet was re-suspended in 1 mL Phosphate buffer saline  
420 (PBS), spun down again at 1000 x *g* and re-suspended in 1 mL of minimal medium (M9 succinate). The  
421 OD<sub>600</sub> was taken and the cells normalised to 0.5 OD<sub>600</sub> in 1 mL of selected medium. Nanosensors were  
422 suspended at 1.5 mg mL<sup>-1</sup> in selected medium. Polyacrylamide nanosensor suspensions were filter  
423 sterilised using 0.22 µm PES filters and 500 µL of medium with nanosensors were combined with  
424 175 µL medium and 75 µL normalised cells to obtain a final concentration of 1 mg mL<sup>-1</sup> nanosensors  
425 and a starting OD<sub>600</sub> of 0.05. For approaches without nanosensors, another 175 µL medium was added  
426 instead of medium with nanosensors. To each well of the 8-well chamber (Ibidi, glass bottom), 300 µL

427 of the suspension was added before the chamber was placed in a box wrapped in aluminium foil and  
428 placed in a static incubator at 37°C. After an incubation of 48 h, the media was carefully removed and  
429 replaced by fresh medium containing 2.5 µg mL<sup>-1</sup> CellMask™ Deep Red plasma membrane stain  
430 (ThermoFisher Scientific). The biofilms were imaged using a Zeiss confocal laser scanning microscope  
431 and the appropriate excitation settings for the fluorescence channels (DAPI = 405 nm, OG/FAM =  
432 488 nm, TAMRA = 555 nm).

#### 433 **Flow cell biofilm of PAO1 growth using BioFlux**

434 Overnight cultures of *P. aeruginosa* grown in LB were used to set up liquid cultures in 5 mL LB using  
435 100 µL of the overnight culture. The cultures were grown to 0.4-0.8 OD<sub>600</sub> and normalised to an 0.05  
436 OD<sub>600</sub> in 1 mL of minimal medium (M9 succinate). Nanosensors were suspended at 5 mg mL<sup>-1</sup> in  
437 selected medium and filter sterilised using 0.22 µm PES filters. The BioFlux flow cell (BioFlux 200 48-  
438 well low shear plate, 0-20 dynes cm<sup>-2</sup>) was prepared according to the manufacturer's instructions  
439 (Fluxion Biosciences, BioFlux System). For the seeding of the cells, 50 µL of the normalised cells were  
440 used with a seeding time of 45 to 60 mins. After the seeding, 1 mL of the prepared medium with or  
441 without nanosensors was used as flow medium. The flow was set to 0.25 dyn cm<sup>-2</sup> and the system was  
442 run for 20-24 h. Time-lapse imaging was applied using a Nikon widefield microscope with brightfield  
443 and fluorescence channels (OG/FAM excitation = 460 nm, TAMRA excitation = 550 nm). Images were  
444 taken every 15 min for 16 h.<sup>84</sup>

#### 445 **Sugar challenge with planktonic NCTC 10449 cells**

446 An overnight culture of NCTC 10449 in BHI was spun down and re-suspended in PBS for 30 min as a  
447 starvation step. The cells were spun down again and re-suspended in saline before being mixed with  
448 positively charged nanosensors in saline to obtain an OD<sub>600</sub> of 1 and a nanosensor concentration of  
449 1 mg mL<sup>-1</sup>. The suspension was aliquoted into a *Greiner* 24-well, PS, flat glass bottom, black walled  
450 microplate using 400 µm per well. Imaging was performed using wide field fluorescence microscopy  
451 with the 40x/0.6 lens (40x objective with 1.5x additional magnification). An image was taken

452 (brightfield, OG/FAM excitation = 460 nm, TAMRA excitation = 550 nm) for time point 0 min before  
453 20  $\mu$ L of either glucose, sucrose, xylose, xylitol (all 1% final conc.) or saline was added to their  
454 respective wells. Images were taken every 5 min for 30 min. Additional controls with glucose, sucrose,  
455 xylose, xylitol and saline solution added to 1 mg mL<sup>-1</sup> positively charged nanosensors in saline were  
456 also imaged to confirm the absence of any pH change brought on by the solutions themselves.

457 The calibration was performed using a Greiner 24-well microplate where pH buffers from pH 8 to  
458 pH 2.5 were mixed with positively charged polyacrylamide nanosensors for a final concentration of  
459 1 mg mL<sup>-1</sup>. Images were taken from each pH using the same exposure settings as the experiment. The  
460 fluorescence intensity ratio from each pH was plotted and the equation of the line calculated to  
461 determine the pH values from the fluorescence intensities generated during the experiment.

## 462 **Nanosensor preparation**

### 463 *Conjugation of the three fluorophores OG, FAM and TAMRA to APMA*

464 A 50 mM (pH 9.5) Sodium tetraborate decahydrate buffer in water was prepared and used to make a  
465 0.002 mmol APMA solution. For each fluorophore, 1 mg was weighed out in separate vials and  
466 suspended in 200  $\mu$ L of the APMA solution. The mixtures were sonicated for 5 min before being  
467 incubated on an oscillator and room temperature for 24 h in the dark. The dyes were stored at -20°C  
468 for further use.

### 469 *Synthesis of polyacrylamide pH-sensitive fluorescent nanosensors*

470 For the synthesis of the nanosensors, 1.59 g AOT and 3.08 g Brij L4 were weighed out, mixed in a 250  
471 mL round bottom flask, and deoxygenated for 15-20 min using argon while being stirred. A 500 mL  
472 round-bottom flask was used to deoxygenate 100 mL hexane for 30 min using argon before 42 mL of  
473 the deoxygenated hexane was added to the AOT and Brij solution. The flask was sealed with a stopper  
474 and a balloon under an argon atmosphere with continuous stirring. For the synthesis of neutral  
475 polyacrylamide nanosensors, 540 mg acrylamide and 160 mg bisacrylamide were dissolved in 1.5 mL



476 deionised water, whereas 513 mg acrylamide, 152 mg bisacrylamide and 119  $\mu\text{L}$  ACTA were used the  
477 preparation of positively charged polyacrylamide nanosensors. The APMA-fluorophore conjugates  
478 were added to the acrylamide solution using 15  $\mu\text{L}$  OG-APMA, 15  $\mu\text{L}$  FAM-APMA and 60  $\mu\text{L}$  TAMRA-  
479 APMA. The mixture was deoxygenated and added to the flask containing the surfactants and hexane  
480 using a syringe. After 10 min, 30  $\mu\text{L}$  of APS (10% w/v) and 15  $\mu\text{L}$  TEMED were added. The flask was  
481 deoxygenated again, sealed, wrapped in aluminium foil, and incubated on the stirrer for 2 h. After the  
482 incubation, the hexane was removed using a rotary evaporator at 30°C and 30 mL of ethanol (100%)  
483 was added. The mixture was transferred to a 50 mL falcon tube and spun down at 3800 x *g* for 3 min.  
484 The supernatant was discarded, and the pellet re-suspended in 30 mL of ethanol (90% in water). The  
485 mixture was spun down again at 3800 x *g* for 3 min and washed twice in 30 mL ethanol (100%) and  
486 then suspended in 10 mL of ethanol (100%). The mixture was transferred into a clean 250 mL flask and  
487 the ethanol was removed using the rotary evaporator at 30°C before the nanosensors were collected  
488 and stored at -20°C in the dark until further use.

#### 489 **Nanosensor calibration and pH calculation using Matlab**

490 Buffer solutions with a pH ranging from 3.0 to 8.0 in 1.0 steps were prepared using 0.2 M Sodium  
491 phosphate ( $\text{Na}_2\text{HPO}_4$ ) and 0.1 M Citric acid ( $\text{C}_6\text{H}_8\text{O}_7$ ) as indicated in Supplementary Table 1. The pH  
492 was adjusted using 0.2 M Sodium phosphate and 0.1 M Citric acid.

493 For the pH calibration of the nanosensors in a BioFlux experiment, 10 mg  $\text{mL}^{-1}$  polyacrylamide were  
494 prepared in deionised water and mixed 1:1 with each of the pH buffers to get a concentration of  
495 5 mg  $\text{mL}^{-1}$ . To enable the calculation of a calibration curve, 500  $\mu\text{L}$  of each solution were added to a  
496 BioFlux plate and was run for 2 min with a flow rate of 0.25  $\text{dyn cm}^{-2}$ . Images were taken for each  
497 buffer sample using a Zeiss CLSM (OG/FAM = 488 nm, TAMRA = 555 nm). The software MatLab was  
498 used to calculate the calibration curve and subsequently to determine the pH of the actual biofilm  
499 images taken with the Zeiss CLSM.

## 500 **Zeta potential and size measurement of nanosensors**

501 For the determination of the zeta potential, 1 mg mL<sup>-1</sup> nanosensors were prepared in PBS (10%) and  
502 transferred into a disposable folded capillary cell using a 2 mL syringe. For the size determination of  
503 polyacrylamide nanosensors, 1 mg mL<sup>-1</sup> nanosensors were prepared in PBS (10%) and transferred into  
504 a cell disposable cuvette. Both the zeta potential and the size were measured using the Zetasizer.

## 505 **Widefield microscopy**

506 Time-lapse imaging and planktonic sugar challenge were performed using a Nikon eclipse Ti2-U  
507 widefield microscope fitted with a Nikon S Plan Fluor ELWD 20x/0.45, Plan Fluor 10x/0.30 or CFI60  
508 40x/0.6 objective lens. Images were captured by using a CoolSNAP™ MYO CCD Camera connected to  
509 Nikon software and analysed using ImageJ.

## 510 **Confocal laser scanning microscopy**

511 To generate more detailed images, a Zeiss LSM 700 compact confocal laser scanning microscope was  
512 used fitted with HAL 100C lamp for light illumination and a Zeiss alpha-Plan-Apochromat 63x/1.46 Oil  
513 objective lens. Images were captured by using AxioCam digital microscope camera connected to ZEN  
514 software and analysed using Zen blue software.

515

## 516 **References**

- 517 1 Roberts, A. E., Kragh, K. N., Bjarnsholt, T. & Diggle, S. P. The Limitations of In Vitro  
518 Experimentation in Understanding Biofilms and Chronic Infection. *J Mol Biol* **427**, 3646-3661,  
519 doi:10.1016/j.jmb.2015.09.002 (2015).
- 520 2 Chua, S. L. *et al.* In vitro and in vivo generation and characterization of *Pseudomonas*  
521 *aeruginosa* biofilm-dispersed cells via c-di-GMP manipulation. *Nat Protoc* **10**, 1165-1180,  
522 doi:10.1038/nprot.2015.067 (2015).
- 523 3 Fernandez-Barat, L. *et al.* Assessment of in vivo versus in vitro biofilm formation of clinical  
524 methicillin-resistant *Staphylococcus aureus* isolates from endotracheal tubes. *Sci Rep* **8**,  
525 11906, doi:10.1038/s41598-018-30494-7 (2018).
- 526 4 Lebeaux, D., Chauhan, A., Rendueles, O. & Beloin, C. From in vitro to in vivo Models of Bacterial  
527 Biofilm-Related Infections. *Pathogens* **2**, 288-356, doi:10.3390/pathogens2020288 (2013).
- 528 5 Brackman, G. & Coenye, T. In Vitro and In Vivo Biofilm Wound Models and Their Application.  
529 *Adv Exp Med Biol* **897**, 15-32, doi:10.1007/5584\_2015\_5002 (2016).

- 530 6 Cross, A. S., Sadoff, J. C., Iglewski, B. H. & Sokol, P. A. Evidence for the role of toxin A in the  
531 pathogenesis of infection with *Pseudomonas aeruginosa* in humans. *J Infect Dis* **142**, 538-546  
532 (1980).
- 533 7 Kossel. *Die experimentelle Bakteriologie und die Infektionskrankheiten mit besonderer*  
534 *Berücksichtigung der Immunitätslehre*. 2 edn, Vol. 1 481–484 (Urban und Schwarzenberg,  
535 1908).
- 536 8 Schimmelbusch, C. Volkmanns Sammlung Klinischer Vorträge. **62**, 312-328 (1993).
- 537 9 Al-Wrafiy, F., Brzozowska, E., Gorska, S. & Gamian, A. Pathogenic factors of *Pseudomonas*  
538 *aeruginosa* - the role of biofilm in pathogenicity and as a target for phage therapy. *Postepy*  
539 *Hig Med Dosw (Online)* **71**, 78-91, doi:10.5604/01.3001.0010.3792 (2017).
- 540 10 Whitchurch, C. B., Tolker-Nielsen, T., Ragas, P. & Mattick, J. S. Extracellular DNA required for  
541 bacterial biofilm formation. *Science* **295**, 1487, doi:10.1126/science.295.5559.1487] (2002).
- 542 11 O'Toole, G. A. & Kolter, R. Flagellar and twitching motility are necessary for *Pseudomonas*  
543 *aeruginosa* biofilm development. *Mol Microbiol* **30**, 295-304 (1998).
- 544 12 Cai, S. *et al.* Pathogenic Effects of Biofilm on *Pseudomonas Aeruginosa* Pulmonary Infection  
545 and Its Relationship to Cytokines. *Med Sci Monit* **22**, 4869-4874, doi:10.12659/msm.898783  
546 (2016).
- 547 13 Rasamiravaka, T., Labtani, Q., Duez, P. & El Jaziri, M. The formation of biofilms by  
548 *Pseudomonas aeruginosa*: a review of the natural and synthetic compounds interfering with  
549 control mechanisms. *Biomed Res Int* **2015**, 1-17, doi:10.1155/2015/759348 (2015).
- 550 14 Flemming, T. F. & Beikler, T. Control of oral biofilms. *Periodontol* **55**, 9-15 (2011).
- 551 15 Schlafer, S. *et al.* pH landscapes in a novel five-species model of early dental biofilm. *PLoS One*  
552 **6**, e25299, doi:10.1371/journal.pone.0025299 (2011).
- 553 16 Takahashi, N. & Nyvad, B. The Role of Bacteria in the Caries Process: Ecological Perspectives.  
554 *Journal of Dental Research* **90**, 294-303, doi:10.1177/0022034510379602 (2011).
- 555 17 Klein, M. I., Hwang, G., Santos, P. H. S., Campanella, O. H. & Koo, H. Streptococcus mutans-  
556 derived extracellular matrix in cariogenic oral biofilms. *Frontiers in Cellular and Infection*  
557 *Microbiology* **5**, doi:10.3389/fcimb.2015.00010 (2015).
- 558 18 Balakrishnan, M., Simmonds, R. S. & Tagg, J. R. Dental caries is a preventable infectious  
559 disease. *Australian Dental Journal* **45**, 235-245 (2000).
- 560 19 Klein, M. I. *et al.* Structural and Molecular Basis of the Role of Starch and Sucrose in  
561 Streptococcus mutans Biofilm Development. *Applied and Environmental Microbiology* **75**,  
562 837-841, doi:10.1128/aem.01299-08 (2009).
- 563 20 Koo, H., Xiao, J., Klein, M. I. & Jeon, J. G. Exopolysaccharides Produced by Streptococcus  
564 mutans Glucosyltransferases Modulate the Establishment of Microcolonies within  
565 Multispecies Biofilms. *Journal of Bacteriology* **192**, 3024-3032, doi:10.1128/jb.01649-09  
566 (2010).
- 567 21 Bowen, W. H. & Koo, H. Biology of Streptococcus mutans-Derived Glucosyltransferases: Role  
568 in Extracellular Matrix Formation of Cariogenic Biofilms. *Caries Research* **45**, 69-86,  
569 doi:10.1159/000324598 (2011).
- 570 22 Selwitz, R. H., Ismail, A. I. & Pitts, N. B. Dental caries. *Lancet* **369**, 51-59, doi:10.1016/s0140-  
571 6736(07)60031-2 (2007).
- 572 23 Salli, K. M. & Ouwehand, A. C. The use of in vitro model systems to study dental biofilms  
573 associated with caries: a short review. *Journal of Oral Microbiology* **7**,  
574 doi:10.3402/jom.v7.26149 (2015).
- 575 24 Xiao, J. *et al.* Biofilm three-dimensional architecture influences in situ pH distribution pattern  
576 on the human enamel surface. *International Journal of Oral Science* **9**, 74-79,  
577 doi:10.1038/ijos.2017.8 (2017).
- 578 25 Hunter, R. C. & Beveridge, T. J. Application of a pH-sensitive fluoroprobe (C-SNARF-4) for pH  
579 microenvironment analysis in *Pseudomonas aeruginosa* biofilms. *Appl Environ Microbiol* **71**,  
580 2501-2510, doi:10.1128/AEM.71.5.2501-2510.2005 (2005).

- 581 26 Allan, V. J. M., Macaskie, L. E. & Callow, M. E. Development of a pH gradient within a biofilm  
582 is dependent upon the limiting nutrient. *Biotechnol Lett* **21**, 407–413 (1999).
- 583 27 Villaverde, S., Mirpuri, R. G., Lewandowski, Z. & Jones, W. L. Physiological and chemical  
584 gradients in a *Pseudomonas putida* 54G biofilm degrading toluene in a flat plate vapor phase  
585 bioreactor. *Biotechnol Bioeng* **56**, 361-371 (1997).
- 586 28 Vroom, J. M. *et al.* Depth penetration and detection of pH gradients in biofilms by two-photon  
587 excitation microscopy. *Appl Environ Microbiol* **65**, 3502-3511 (1999).
- 588 29 Williamson, K. S. *et al.* Heterogeneity in *Pseudomonas aeruginosa* biofilms includes expression  
589 of ribosome hibernation factors in the antibiotic-tolerant subpopulation and hypoxia-induced  
590 stress response in the metabolically active population. *J Bacteriol* **194**, 2062-2073,  
591 doi:10.1128/JB.00022-12 (2012).
- 592 30 Wan, N. *et al.* Bacterial Metabolism During Biofilm Growth Investigated by <sup>13</sup>C Tracing. *Front*  
593 *Microbiol* **9**, 2657, doi:10.3389/fmicb.2018.02657 (2018).
- 594 31 Ahmed, N. A. A. M., Petersen, F. C. & Scheie, A. A. Biofilm formation and autoinducer-2  
595 signaling in *Streptococcus intermedius* - role of thermal and pH factors. *Oral Microbiol*  
596 *Immunol* **23**, 492–497 (2008).
- 597 32 Hardie, K. R. & Heurlier, K. Establishing bacterial communities by 'word of mouth': LuxS and  
598 autoinducer 2 in biofilm development. *Nat Rev Microbiol* **6**, 635-643,  
599 doi:10.1038/nrmicro1916 (2008).
- 600 33 Vendeville, A., Winzer, K., Heurlier, K., Tang, C. M. & Hardie, K. R. Making 'sense' of  
601 metabolism: autoinducer-2, LuxS and pathogenic bacteria. *Nat Rev Microbiol* **3**, 383-396,  
602 doi:10.1038/nrmicro1146 (2005).
- 603 34 Sun, S. J. *et al.* The response of *Serratia marcescens* JG to environmental changes by quorum  
604 sensing system. *Arch Microbiol* **198**, 585-590, doi:10.1007/s00203-016-1213-9 (2016).
- 605 35 Yates, E. A. *et al.* N-acylhomoserine lactones undergo lactonolysis in a pH-, temperature-, and  
606 acyl chain length-dependent manner during growth of *Yersinia pseudotuberculosis* and  
607 *Pseudomonas aeruginosa*. *Infect Immun* **70**, 5635-5646, doi:10.1128/iai.70.10.5635-  
608 5646.2002 (2002).
- 609 36 Hošťacká, A., Čížnár, I. & Štefcovičová, M. Temperature and pH affect the production of  
610 bacterial biofilm. *Folia Microbiol* **55**, 75-78 (2010).
- 611 37 Stoodley, P., De Beer, D. & Lappin-Scott, H. M. Influence of electric fields and pH on biofilm  
612 structure as related to the bioelectric effect. *Antimicrob Agents Chemother* **41**, 1876–1879  
613 (1997).
- 614 38 Nostro, A. *et al.* Effect of alkaline pH on staphylococcal biofilm formation. *APMIS* **120**, 733-  
615 742, doi:10.1111/j.1600-0463.2012.02900.x (2012).
- 616 39 D'Urzo, N. *et al.* Acidic pH strongly enhances *in vitro* biofilm formation by a subset of  
617 hypervirulent st-17 *Streptococcus agalactiae* strains. *Appl Environ Microbiol* **80**, 2176–2185  
618 (2014).
- 619 40 Ho, Y. R. *et al.* The enhancement of biofilm formation in Group B streptococcal isolates at  
620 vaginal pH. *Med Microbiol Immunol* **202**, 105-115, doi:10.1007/s00430-012-0255-0 (2013).
- 621 41 Kulichikhin, K. Y., Aitio, O., Chirkova, T. V. & Fagerstedt, K. V. Effect of oxygen concentration  
622 on intracellular pH, glucose-6-phosphate and NTP content in rice (*Oryza sativa*) and wheat  
623 (*Triticum aestivum*) root tips: *in vivo* <sup>31</sup>P-NMR study. *Physiol Plant* **129**, 507-518,  
624 doi:10.1111/j.1399-3054.2006.00819.x (2007).
- 625 42 Ramsing, N. B., Kühn, M. & Jørgensen, B. B. Distribution of sulfate-reducing bacteria, O<sub>2</sub>, and  
626 H<sub>2</sub>S in photosynthetic biofilms determined by oligonucleotide probes and microelectrodes.  
627 *Appl Environ Microbiol* **59**, 3840-3849 (1993).
- 628 43 Søndergaard, R. V., Henriksen, J. R. & Andresen, T. L. Design, calibration and application of  
629 broad-range optical nanosensors for determining intracellular pH. *Nat Protoc* **9**, 2841-2858,  
630 doi:10.1038/nprot.2014.196 (2014).

- 631 44 Hidalgo, G. *et al.* Functional tomographic fluorescence imaging of pH microenvironments in  
632 microbial biofilms by use of silica nanoparticle sensors. *Appl Environ Microbiol* **75**, 7426-7435,  
633 doi:10.1128/AEM.01220-09 (2009).
- 634 45 Chauhan, V. M., Orsi, G., Brown, A., Pritchard, D. I. & Aylott, J. W. Mapping the pharyngeal and  
635 intestinal pH of *Caenorhabditis elegans* and real-time luminal pH oscillations using extended  
636 dynamic range pH-sensitive nanosensors. *ACS Nano* **7**, 5577–5587 (2013).
- 637 46 Chauhan, V. M., Burnett, G. R. & Aylott, J. W. Dual-fluorophore ratiometric pH nanosensor  
638 with tuneable  $pK_a$  and extended dynamic range. *Analyst* **136**, 1799-1801,  
639 doi:10.1039/c1an15042a (2011).
- 640 47 Benjaminsen, R. V. *et al.* Evaluating nanoparticle sensor design for intracellular pH  
641 measurements. *ACS Nano* **5**, 5864–5873 (2011).
- 642 48 Sun, H., Almdal, K. & Andresen, T. L. Expanding the dynamic measurement range for polymeric  
643 nanoparticle pH sensors. *Chem Commun (Camb)* **47**, 5268-5270, doi:10.1039/c1cc10439j  
644 (2011).
- 645 49 Höckel, M. *et al.* Intratumoral  $pO_2$  predicts survival in advanced cancer of the uterine cervix.  
646 *Radiother Oncol* **26**, 45-50 (1993).
- 647 50 Fulaz, S. *et al.* Ratiometric Imaging of the in Situ pH Distribution of Biofilms by Use of  
648 Fluorescent Mesoporous Silica Nanosensors. *ACS Appl Mater Interfaces* **11**, 32679-32688,  
649 doi:10.1021/acsami.9b09978 (2019).
- 650 51 Bae, S. W., Tan, W. & Hong, J. I. Fluorescent dye-doped silica nanoparticles: new tools for  
651 bioapplications. *Chem Commun (Camb)* **48**, 2270-2282, doi:10.1039/c2cc16306c (2012).
- 652 52 Ikuma, K., Decho, A. W. & Lau, B. L. When nanoparticles meet biofilms-interactions guiding  
653 the environmental fate and accumulation of nanoparticles. *Front Microbiol* **6**, 591,  
654 doi:10.3389/fmicb.2015.00591 (2015).
- 655 53 Xiong, M. H., Bao, Y., Yang, X. Z., Zhu, Y. H. & Wang, J. Delivery of antibiotics with polymeric  
656 particles. *Adv Drug Deliv Rev* **78**, 63-76, doi:10.1016/j.addr.2014.02.002 (2014).
- 657 54 Singh, N. *et al.* Dual bioresponsive antibiotic and quorum sensing inhibitor combination  
658 nanoparticles for treatment of *Pseudomonas aeruginosa* biofilms in vitro and ex vivo.  
659 *Biomater Sci*, doi:10.1039/c9bm00773c (2019).
- 660 55 Forier, K. *et al.* Lipid and polymer nanoparticles for drug delivery to bacterial biofilms. *J Control*  
661 *Release* **190**, 607-623, doi:10.1016/j.jconrel.2014.03.055 (2014).
- 662 56 Peulen, T. O. & Wilkinson, K. J. Diffusion of nanoparticles in a biofilm. *Environ Sci Technol* **45**,  
663 3367-3373, doi:10.1021/es103450g (2011).
- 664 57 Sahle-Demessie, E. & Tadesse, H. Kinetics and equilibrium adsorption of nano-TiO<sub>2</sub> particles  
665 on synthetic biofilm. *Surface Science* **605**, 1177-1184, doi:10.1016/j.susc.2011.03.022 (2011).
- 666 58 Habimana, O. *et al.* Diffusion of nanoparticles in biofilms is altered by bacterial cell wall  
667 hydrophobicity. *Appl Environ Microbiol* **77**, 367-368, doi:10.1128/AEM.02163-10 (2011).
- 668 59 Ahmed, K. & Jones, M. N. The effect of shear on the desorption of liposomes adsorbed to  
669 bacterial biofilms. *J Liposome Res* **13**, 187-197, doi:10.1081/LPR-120020320 (2003).
- 670 60 Desai, A. S., Chauhan, V. M., Johnston, A. P., Esler, T. & Aylott, J. W. Fluorescent nanosensors  
671 for intracellular measurements: synthesis, characterization, calibration, and measurement.  
672 *Front Physiol* **4**, 1-15, doi:10.3389/fphys.2013.00401 (2014).
- 673 61 Aylott, J. W. Optical nanosensors - an enabling technology for intracellular measurements.  
674 *Analyst* **128**, 309-312, doi:10.1039/b302174m (2003).
- 675 62 [www.comstat.dk](http://www.comstat.dk). <[www.comstat.dk](http://www.comstat.dk)> (  
676 63 Heydorn, A. *et al.* Quantification of biofilm structures by the novel computer program  
677 COMSTAT. *Microbiology* **146**, 2395–2407 (2000).
- 678 64 Vorregaard, M. in *Technical University of Denmark: Kongens Lyngby* (Denmark, 2008).  
679 65 version 9.6.0. (R2019a) (The MathWorks Inc., Natick, Massachusetts, 2019).
- 680 66 Stewart, P. S. Diffusion in Biofilms. *Journal of Bacteriology* **185**, 1485-1491,  
681 doi:10.1128/jb.185.5.1485-1491.2003 (2003).



- 682 67 Jefferson, K. K., Goldmann, D. A. & Pier, G. B. Use of confocal microscopy to analyze the rate  
683 of vancomycin penetration through *Staphylococcus aureus* biofilms. *Antimicrob Agents*  
684 *Chemother* **49**, 2467-2473, doi:10.1128/AAC.49.6.2467-2473.2005 (2005).
- 685 68 Rani, S. A., Pitts, B. & Stewart, P. S. Rapid diffusion of fluorescent tracers into *Staphylococcus*  
686 *epidermidis* biofilms visualized by time lapse microscopy. *Antimicrob Agents Chemother* **49**,  
687 728-732, doi:10.1128/AAC.49.2.728-732.2005 (2005).
- 688 69 Takenaka, S., Pitts, B., Trivedi, H. M. & Stewart, P. S. Diffusion of macromolecules in model  
689 oral biofilms. *Appl Environ Microbiol* **75**, 1750-1753, doi:10.1128/AEM.02279-08 (2009).
- 690 70 Messiaen, A. S., Forier, K., Nelis, H., Braeckmans, K. & Coenye, T. Transport of nanoparticles  
691 and tobramycin-loaded liposomes in *Burkholderia cepacia* complex biofilms. *PLoS One* **8**,  
692 e79220, doi:10.1371/journal.pone.0079220 (2013).
- 693 71 Li, J. *et al.* Block Copolymer Nanoparticles Remove Biofilms of Drug-Resistant Gram-Positive  
694 Bacteria by Nanoscale Bacterial Debridement. *Nano Lett* **18**, 4180-4187,  
695 doi:10.1021/acs.nanolett.8b01000 (2018).
- 696 72 Enomoto, R. *et al.* Cationic surfactants induce apoptosis in normal and cancer cells. *Ann N Y*  
697 *Acad Sci* **1095**, 1-6, doi:10.1196/annals.1397.001 (2007).
- 698 73 Li, J. & McLandsborough, L. A. The effects of the surface charge and hydrophobicity of  
699 *Escherichia coli* on its adhesion to beef muscle. *International Journal of Food Microbiology* **53**,  
700 185-193 (1999).
- 701 74 Moye, Z. D., Zeng, L. & Burne, R. A. Fueling the caries process: carbohydrate metabolism and  
702 gene regulation by *Streptococcus mutans*. *Journal of Oral Microbiology* **6**,  
703 doi:10.3402/jom.v6.24878 (2014).
- 704 75 Colby, S. M. & Russell, R. R. B. Sugar metabolism by mutans streptococci. *Journal of Applied*  
705 *Microbiology* **83**, S80-S88, doi:10.1046/j.1365-2672.83.s1.9.x (1997).
- 706 76 Dashper, S. G. & Reynolds, E. C. Lactic acid excretion by *Streptococcus mutans*. *Microbiology-*  
707 *Uk* **142**, 33-39, doi:10.1099/13500872-142-1-33 (1996).
- 708 77 Paulino, T. P., Cardoso, M., Bruschi-Thedei, G. C. M., Ciancaglini, P. & Thedei, G. Fermentable  
709 and non-fermentable sugars - A simple experiment of anaerobic metabolism. *Biochemistry*  
710 *and Molecular Biology Education* **31**, 180-184, doi:10.1002/bmb.2003.494031030211 (2003).
- 711 78 Kakuta, H., Iwami, Y., Mayanagi, H. & Takahashi, N. Xylitol inhibition of acid production and  
712 growth of mutans streptococci in the presence of various dietary sugars under strictly  
713 anaerobic conditions. *Caries Research* **37**, 404-409, doi:10.1159/000073391 (2003).
- 714 79 Miyasawa, H., Iwami, Y., Mayanagi, H. & Takahashi, N. Xylitol inhibition of anaerobic acid  
715 production by *Streptococcus mutans* at various pH levels. *Oral Microbiology and Immunology*  
716 **18**, 215-219, doi:10.1034/j.1399-302X.2003.00068.x (2003).
- 717 80 Takahashi, N. & Washio, J. Metabolomic Effects of Xylitol and Fluoride on Plaque Biofilm in  
718 *Vivo*. *Journal of Dental Research* **90**, 1463-1468, doi:10.1177/0022034511423395 (2011).
- 719 81 Klockgether, J. *et al.* Genome diversity of *Pseudomonas aeruginosa* PAO1 laboratory strains. *J*  
720 *Bacteriol* **192**, 1113-1121, doi:10.1128/JB.01515-09 (2010).
- 721 82 Clarke, J. K. On the Bacterial Factor in the Aetiology of Dental Caries. *Br J Exp Pathol.* **5**, 141-  
722 147 (1924).
- 723 83 Bertani, G. Studies on lysogenesis I. The mode of phage liberation by lysogenic *Escherichia coli*.  
724 *J Bacteriol* **62**, 293-300 (1951).
- 725 84 Brown, J. M., Blunk, B., Williams, P. & Hardie, K. R. Microfluidic-based Growth and Imaging of  
726 Bacterial Biofilms. *Bio-Protocol* **9**, doi:10.21769/BioProtoc.3460 (2019).

727

728

## 729 **Acknowledgements**

730 We thank Katherine Thompson at Unilever R&D Port Sunlight, Merseyside, UK for providing us with  
731 scientific insights to assist our research. This work was partly funded by Unilever plc. This work was  
732 also supported by funding from the Biotechnology and Biological Sciences Research Council (BBSRC;  
733 Award Number BB/R012415/1). B.B. was a recipient of University of Nottingham PhD scholarship  
734 shared jointly between the Schools of Life Sciences and Pharmacy, and M.P. was funded by BBSRC  
735 iCASE PhD studentship through grant BB/M008770/1. This work was supported by a Nottingham  
736 Research Fellowship from the University of Nottingham, UK (V.M.C). We also thank Dean Walsh for  
737 useful discussions and help with the nanosensor preparation and James Brown for providing strains.

## 738 **Author information**

### 739 **Affiliations**

740 *Biodiscovery Institute, University of Nottingham, Nottingham, UK*

741 Birte Blunk, Mark Perkins, Kim R. Hardie

742 *School of Pharmacy, Boots Science Building, University of Nottingham, Nottingham, UK*

743 Birte Blunk, Mark Perkins, Veeren M. Chauhan, Jonathan W. Aylott

### 744 **Contributions**

745 The study was designed by B.B., M.P., J.W.A. and K.R.H. with contributions from V.M.C. B.B. performed  
746 all experiments involving *Pseudomonas aeruginosa* and M.P. carried out experiments on  
747 *Streptococcus mutans*. B.B. and M.P. performed the data analysis. B.B., M.P., J.W.A. and K.R.H. wrote  
748 the manuscript and V.M.C. was involved in critically reviewing the paper.

### 749 **Corresponding author**

750 Correspondence to Kim R. Hardie at [kim.hardie@nottingham.ac.uk](mailto:kim.hardie@nottingham.ac.uk)

751 **Ethics declarations**

752 **Competing interests**

753 The authors declare no competing interests.

754

755 **Figure legends**

756 **Fig. 1 The charge of nanosensors can influence the biofilm formation of *P. aeruginosa* PAO1-N.**

757 Differently charged nanoparticles at 1 mg mL<sup>-1</sup> were incubated with *P. aeruginosa* PAO1-N under static  
758 conditions. Quantitative Comstat analysis of the biofilm images were performed using ImageJ. (a)  
759 Representative confocal images of *P. aeruginosa* PAO1-N stained with CellMask™ without the  
760 addition of nanoparticles (left panel), grown with neutral polyacrylamide nanosensors (left central  
761 panel), with positively charged polyacrylamide nanosensors containing fluorophores (right central  
762 panel) or with positively charged polyacrylamide nanoparticles without fluorophores (right panel). The  
763 top row is a 3D view from the top of the biofilm, the bottom row shows a 3D view from the front of  
764 the biofilm. Graphs represent (b) biomass and (c) surface to biovolume ratio. Error bars represent  
765 standard deviation measured for different biofilm images, where n=10 (control), n=7 (neutral  
766 nanosensors and positive nanoparticles without dyes) and n=8 (positive nanosensors).

767 **Fig. 2 Enhanced *P. aeruginosa* biofilm formation as a result of positively charged nanosensors is**  
768 **concentration dependent.**

769 (a) Confocal images of *P. aeruginosa* PAO1-N wildtype stained with CellMask™ without the addition  
770 of nanoparticles (left panel) or grown with positive polyacrylamide nanosensors at 1 mg mL<sup>-1</sup> (left  
771 central panel), 10 mg mL<sup>-1</sup> (right central panel) or 20 mg mL<sup>-1</sup> (right panel). The top row shows a  
772 representative 3D view from the top of the biofilm, the bottom row shows a 3D view from the front  
773 of the biofilm. Quantitative Comstat analysis of the biofilm images were performed using ImageJ.  
774 Graphs represent (b) biomass and (c) surface to biovolume ratio. Error bars represent standard



775 deviation measured for different biofilm images, where n=10 (control), n=8 (1 mg mL<sup>-1</sup>), n=12  
776 (10 mg mL<sup>-1</sup>) and n=13 (20 mg mL<sup>-1</sup>).

777 **Fig. 3 Neutral as well as positive nanosensors can penetrate established *P. aeruginosa* biofilms**  
778 **under static conditions.**

779 (a) Confocal images of *P. aeruginosa* PAO1-N grown without (left panel) or with (right panel) 1 mg mL<sup>-1</sup>  
780 positive nanoparticles without fluorophores for 48 h. Images show cells stained with CellMask  
781 (magenta) and TAMRA fluorescence of nanosensors (yellow). For the purpose of these images TAMRA  
782 has been false coloured to yellow to facilitate visualisation of nanoparticle distribution. Top panel =  
783 Before the addition of positively charged pH-sensitive polyacrylamide nanosensors. Bottom panel =  
784 After the addition of positively charged pH-sensitive polyacrylamide nanosensors to a final  
785 concentration of 1 mg mL<sup>-1</sup>. Left panel = (b) Confocal images of *P. aeruginosa* PAO1-N with same  
786 conditions as in (a), but with the addition of 1 mg mL<sup>-1</sup> neutral pH-sensitive polyacrylamide  
787 nanosensors.

788 **Fig. 4 Penetration of established *P. aeruginosa* biofilms by nanosensors under flow conditions was**  
789 **independent of the charge of the nanosensors.**

790 *P. aeruginosa* biofilms were initially grown for 12 h without nanosensors before the medium was  
791 switched to medium with 5 mg mL<sup>-1</sup> positive or neutral nanosensors for 5 h followed by a switch back  
792 to medium without nanosensors for another 5 h. Confocal images show nanosensor fluorescence  
793 (TAMRA, yellow) within the biofilm after the final wash step for both nanosensors (positive and  
794 neutral). For the purpose of these images TAMRA has been false coloured to yellow to facilitate  
795 visualisation of nanoparticle distribution.

796 **Fig. 5 A streamer of acidic pH is evident in the downstream flow of *P. aeruginosa* biofilm**  
797 **microcolonies.**

798 Time-lapse images of a *P. aeruginosa* biofilm grown in a BioFlux flow cell and imaged using a  
799 fluorescence Nikon widefield microscope. (a) Time-lapse imaging of a *P. aeruginosa* biofilm grown in

800 a BioFlux flow cell after 7 h (start of microcolony formation), 10 h, 13 h and 16 h. Red streaks being  
801 released downstream by the microcolonies into the medium after 13 h of growth are indicated by the  
802 white arrows. Positively charged pH-sensitive polyacrylamide nanosensors were included at  $5 \text{ mg mL}^{-1}$   
803 to visualize the red streaks. Scale bars represent  $50 \text{ }\mu\text{m}$ . **(b)** Fluorescence intensity of OG/FAM and  
804 TAMRA was measured using wide field images in ImageJ and the ratio is plotted against the time of  
805 incubation starting after 7 h when microcolony formation occurred. Error bars represent standard  
806 error measured for different areas of the images, where  $n=6$ . To view the movie, see Supplementary  
807 Movie 1.

808 **Fig. 6 *P. aeruginosa* microcolonies in flow biofilms have an acidic centre.**

809 **(a)** The confocal 3D Z-stack image of single microcolony from a *P. aeruginosa* biofilm grown in a BioFlux  
810 flow cell system with  $1 \text{ mg mL}^{-1}$  positively charged pH-sensitive polyacrylamide nanosensors. The pH  
811 variation was observed after biofilm growth for 22 h. MatLab analysis of confocal images shows a  
812 lower pH of 3.5 – 4.5 within the core of microcolonies and a higher pH of 6.0 – 7.0 at the outer parts.  
813 Images represent 3D rendering of the biofilm Z-stack **(b)** and individual pH maps at the bottom of the  
814 biofilm ( $0 \text{ }\mu\text{m}$ ) and  $5 \text{ }\mu\text{m}$ ,  $10 \text{ }\mu\text{m}$ ,  $15 \text{ }\mu\text{m}$  and  $20 \text{ }\mu\text{m}$  from the bottom into the biofilm **(c)**. Scale bars  
815 represent  $10 \text{ }\mu\text{m}$ .

816 **Fig. 7 Fermentation of glucose and sucrose, but not xylose, xylitol or saline by *S. mutans* visualised**  
817 **with pH-sensitive nanosensors.**

818 Positively charged pH-sensitive nanosensors at a concentration of  $1 \text{ mg mL}^{-1}$  were added to planktonic  
819 *S. mutans* grown overnight and normalized to an  $\text{OD}_{600}$  of 1. Time-lapse images were taken with a  
820 Nikon widefield microscope. **(a)** Representative fluorescence images of cells in saline before the  
821 addition of either saline, glucose, sucrose, xylose or xylitol (top panel) to a final concentration of 1%  
822 or after 30 minutes (bottom panel). An overlay image of the fluorescence channels for green  
823 (OG/FAM) and red (TAMRA) is shown. **(b)** The pH of each condition at the indicated time points was

824 calculated and plotted against the time of addition. Error bars represent standard deviation measured  
825 for different images, where n=9.

826 **Table 1 Characteristics of the nanosensors synthesized in this study**

827 The size, polydispersity index (PDI) and zeta potential values of positively charged polyacrylamide  
828 nanosensors, positively charged polyacrylamide nanosensors without dyes and neutral  
829 polyacrylamide nanosensors, determined by a Malvern™ DLS instrument.

830

831 **Figures**

832 **Fig. 1**

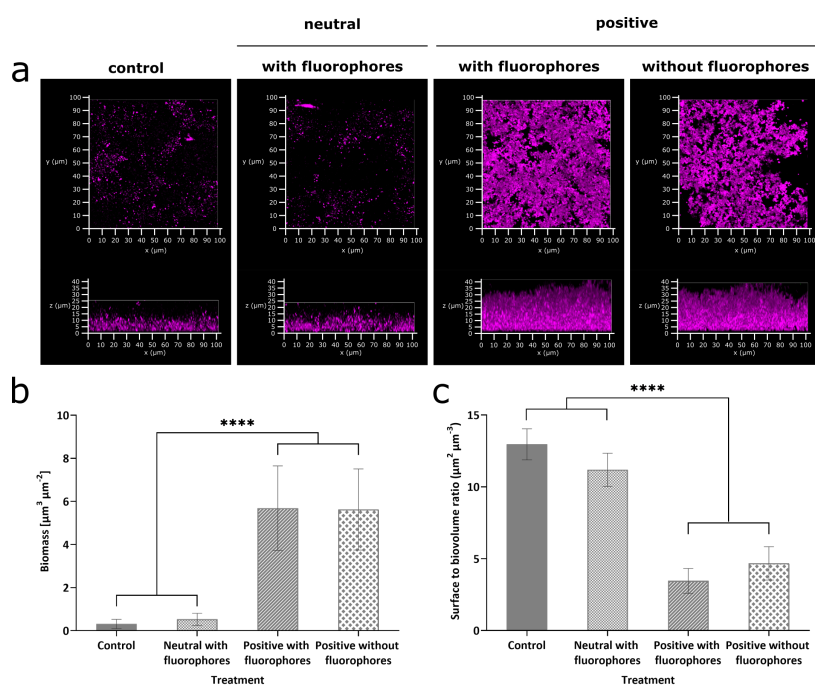

833

834 **Fig. 2**

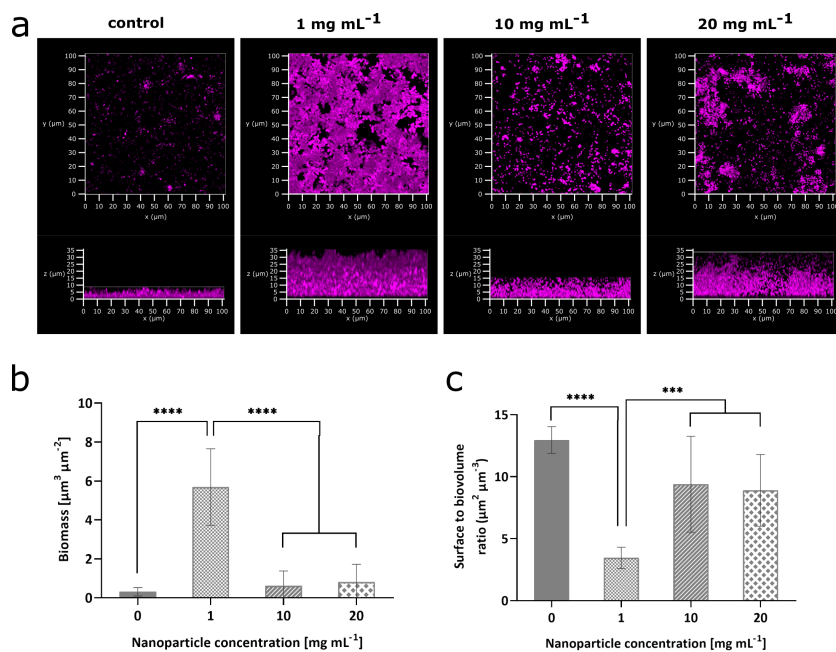

835

836

837 **Fig. 3**

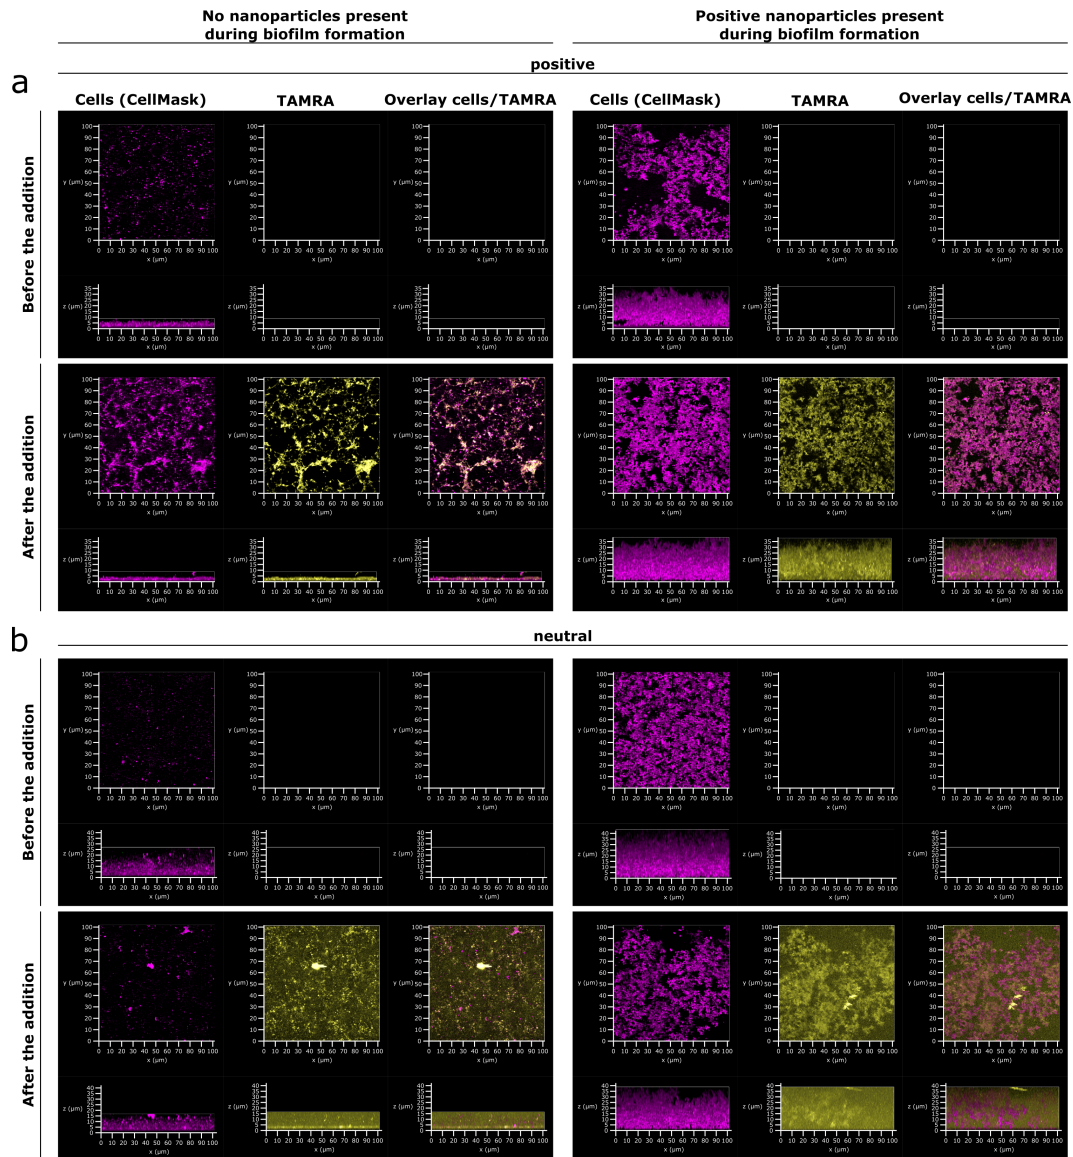

841 **Fig. 4**

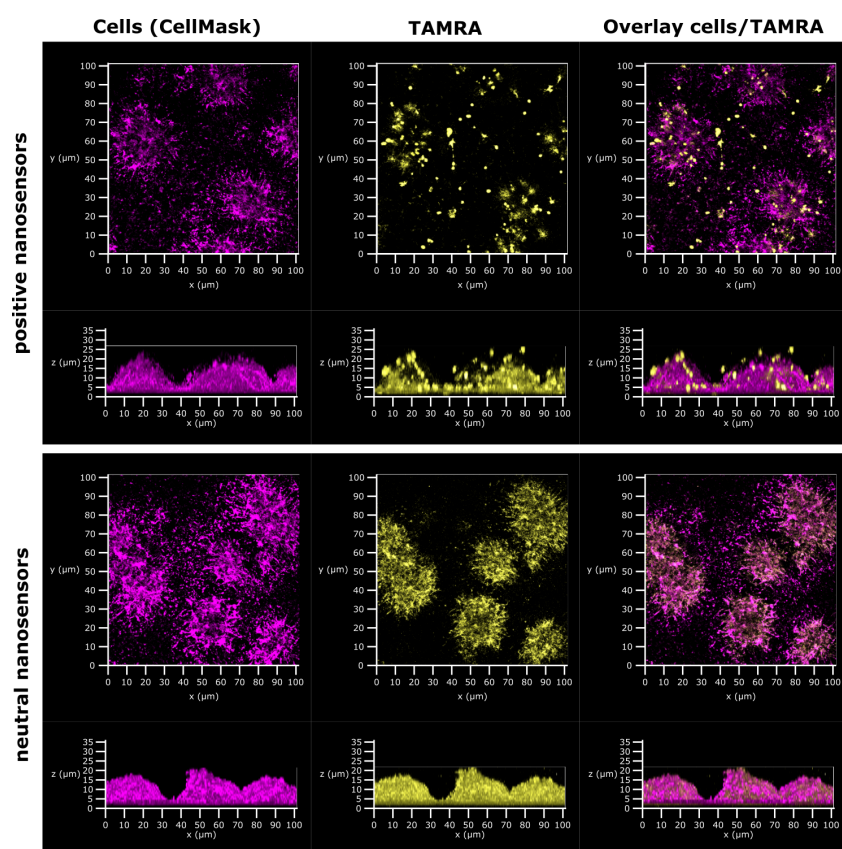

842

843

844 **Fig. 5**

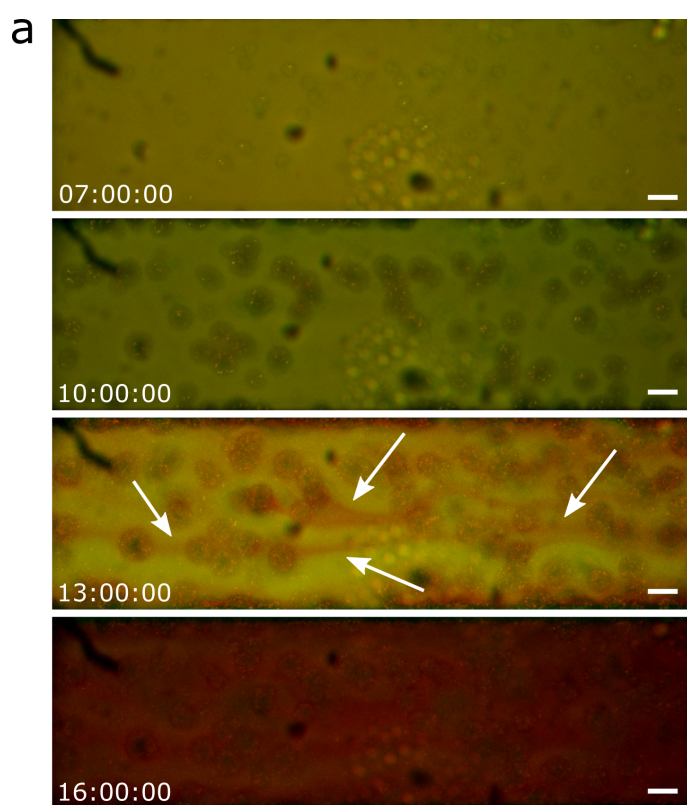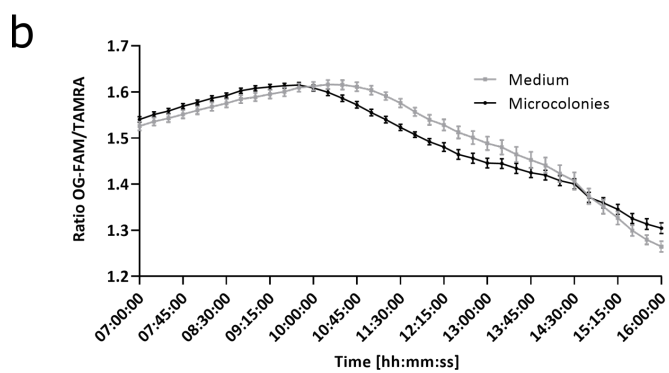

845



846 **Fig. 6**

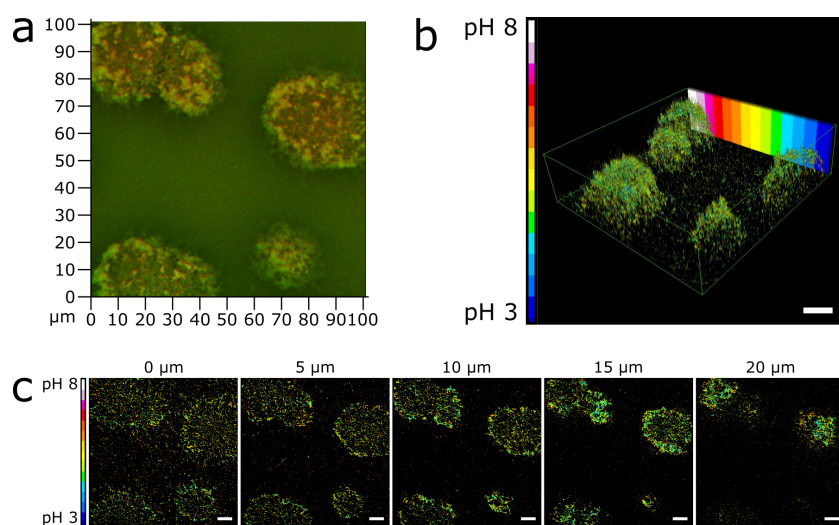

848 **Fig. 7**

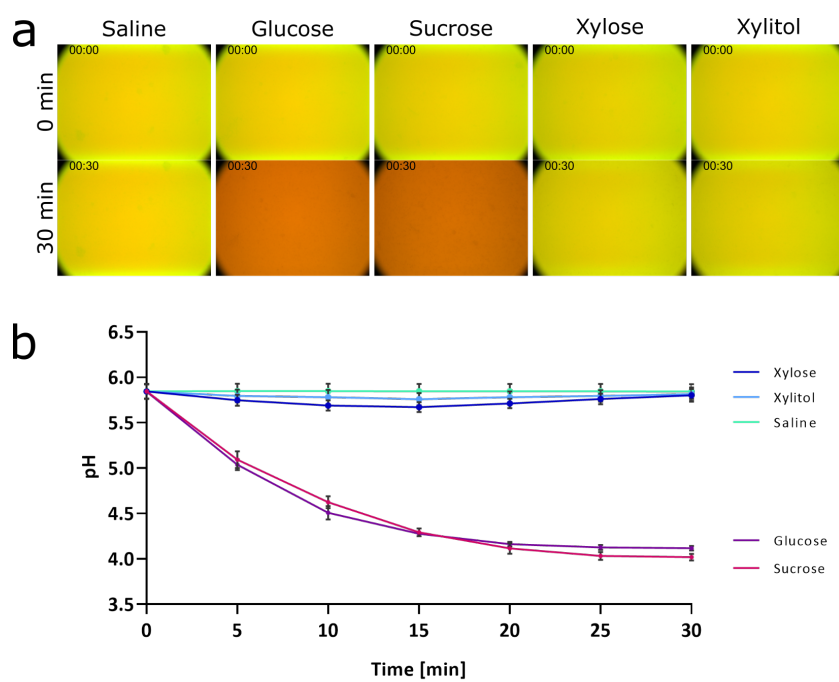



852 **Table 1.** Characteristics of the nanosensors synthesized in this study

|                  | Positively charged<br>polyacrylamide<br>nanosensors (n=3) | Positively charged<br>polyacrylamide<br>nanoparticles without<br>dyes (n=1) | Neutral polyacrylamide<br>nanosensors (n=1) |
|------------------|-----------------------------------------------------------|-----------------------------------------------------------------------------|---------------------------------------------|
| Size (nm)        | 34.77 +/- 4.63                                            | 46.41                                                                       | 37.51                                       |
| PDI              | 0.168 +/- 0.036                                           | 0.167                                                                       | 0.096                                       |
| Z-potential (mV) | 15.6 +/- 3.85                                             | 17.7                                                                        | -4.75                                       |

853 *PDI* polydispersity index, *n* number of preparations analysed

854
